# Supplementary material for: NMNAT1 Is a Survival Factor in Actinomycin D-Induced Osteosarcoma Cell Death
Source: MDPI journal article supplement (doi:10.3390/ijms22168869), 2021-08-18
Supplement: s1 [file s1]

**Table S1.** Antibodies used for western blotting.

| Antibody Specific for       | Host Species | Cat#             | Supplier                             | Dilution |
|-----------------------------|--------------|------------------|--------------------------------------|----------|
| poly(ADP-ribose)            | mouse        | N/A              | produced in house (10H hybridoma)    | 1:500    |
| NMNAT1                      | rabbit       | sc-271557        | Santacruz<br>(Dallas, TX, USA)       | 1:1000   |
| human actin                 | mouse        | sc-47778         | Santacruz<br>(Dallas, TX, USA)       | 1:20000  |
| BAX                         | rabbit       | ab32503          | Abcam<br>(Cambridge, UK)             | 1:1000   |
| NOXA                        | mouse        | ab13654          | Abcam<br>(Cambridge, UK)             | 1:100    |
| PUMA                        | rabbit       | ab9643           | Abcam<br>(Cambridge, UK)             | 1:1000   |
| p21                         | mouse        | 05-655           | Sigma<br>(St. Louis, MO, USA)        | 1:1000   |
| anti-phospho histon<br>H2AX | mouse        | 4418-APC-<br>100 | Trevigen<br>(Gaithersburg, MD, USA)  | 1:1000   |
| Acetyl-p53 (Lys379)         | mouse        | 2570S            | Cell Signaling<br>(Danvers, MA, USA) | 1:1000   |
| anti-mouse IgG (HRP)        | horse        | 7076S            | Cell Signaling<br>(Danvers, MA, USA) | 1:3000   |
| anti rabbit IgG (HRP)       | goat         | 7074S            | Cell Signaling<br>(Danvers, MA, USA) | 1:1500   |

**Table S2.** Antibodies and dyes used for High Content Analysis.

| Antibody Specific for                             | Host Species | Cat#   | Supplier                               | Dilution/Concentration |
|---------------------------------------------------|--------------|--------|----------------------------------------|------------------------|
| CellEvent™ Caspase-3/7 Green<br>Detection Reagent | -            | C10423 | Thermo Fischer<br>(Waltham, MA<br>USA) | 7 $\mu$ M              |

**Table S3.** Sequences of primers, used in quantitative PCR experiments.

| Primers        | Fw                   | Rw                   |
|----------------|----------------------|----------------------|
| <i>hNMNAT1</i> | AAAGGCCTGGAAGGAAGAGG | CCCATAGTTGGCCACGATTT |
| <i>hNMNAT2</i> | CATATTTCTGGTGGCATCT  | CTGGTCCTGCCTATGTGGTT |
| <i>hNMNAT3</i> | GCGCACATCCAGGAAATAGT | TGGCACTGATCTCATTCTGC |
| <i>hBAX</i>    | CTGCAGAGGATGATTGCCG  | TGCCACTCGGAAAAAGACCT |

|                     |                          |                        |
|---------------------|--------------------------|------------------------|
| <i>hNOXA</i>        | CTGGAAGTCGAGTGTGCTACTC   | TGAAGGAGTCCCCTCATGCAAG |
| <i>h45S</i>         | ACCCACCCTCGGTGSGA        | CAAGGCACGCCTCTCAGAT    |
| <i>h18S_45S</i>     | CTCACCACGGGAAACCTCAC     | CGCTCCACCAACTAAGAACG   |
| <i>hTIGAR</i>       | ATGAGGACAAAGCAGACCATGC   | GCTTTGCCTTCTACAACCCC   |
| <i>hPUMA</i>        | GAGCAGGGCAGGAAGTAACAA    | GGCAGACCCCATGCCAAAT    |
| <i>hp21</i>         | AGTCAGTTCCTTGTGGAGCC     | CATTAGCGCATCACAGTCGC   |
| <i>h36B4</i>        | CCATTGAAATCCTGAGTGATGTG  | GTCGAACACCTGCTGGATGAC  |
| <i>hcyclophilin</i> | GTCTCCTTTGAGCTGTTTGCAGAC | CTTGCCACCAGTGCCATTATG  |

**Table S4.** Compounds which have been used for the treatments

| <b>Compound</b>             | <b>Cat#</b>      | <b>Supplier</b>                         |
|-----------------------------|------------------|-----------------------------------------|
| Z-DEVD-fmk                  | S7312            | Selleckchem<br>(Houston, TX, USA)       |
| Necrostatin 1               | 480065           | Calbiochem<br>(Billerica, MA, USA)      |
| Actinomycin D               | S8964            | Selleckchem<br>(Houston, TX, USA)       |
| Daunorubicin                | D8809            | Sigma (St. Louis, MO, USA)              |
| Bortezomib                  | HY-10227/CS-1039 | MedChemExpress<br>(New Jersey, NJ, USA) |
| Digoxin                     | D6003            | Sigma<br>(St. Louis, MO, USA)           |
| Doxorubicin                 | OGYI-T-8808/04   | Teva<br>(Debrecen, Hungary)             |
| Mitoxantron-+dihydrochlorid | M6545            | Sigma<br>(St. Louis, MO, USA)           |
| Teniposide                  | 1787             | Selleckchem<br>Houston, TX, USA)        |
| Idarubicin                  | S1228            | Selleckchem<br>(Houston, TX, USA)       |
| Epirubicin                  | S1223            | Selleckchem<br>(Houston, TX, USA)       |
| RNAse                       | R4875            | Sigma<br>(St. Louis, MO, USA)           |
| Propidium iodide            | P4864            | Sigma<br>(St. Louis, MO, USA)           |
